# Supplementary material for: Inorganic Nutrients Increase Humification Efficiency and C-Sequestration in an Annually Cropped Soil
Source: PLoS One. 2016 May 4;11(5):e0153698. doi: 10.1371/journal.pone.0153698 (PMC4856260; doi:10.1371/journal.pone.0153698)
Supplement: S1 Table — (XLSX) [file pone.0153698.s001.xlsx]

## Sheet: Crop biomass, nutrient data
	Crop biomass, nutrient information 2007-2011
	Crop yield: wheat (w) or canola (c) - t/ha
		2007 W						2008 W						2009 W						2010 C						2011 W
	(-) nutrients	HdYield	QdYield	HI	Biomass	Stubble		HdYield	QdYield	HI	Biomass	Stubble		HdYield	QdYield	HI	Biomass	Stubble		HdYield	QdYield	HI	Biomass	Stubble		HdYield	QdYield	HI	Biomass	Stubble
	Rep 1	2.50728	3.15	0.2804	11.234	8.08395		3.78377	4.63735	0.359429	12.902	8.26464		2.98318	3.6	0.3559	10.1152	6.5152		0	2.01207	0.360644	5.57909	3.56703		4.65683	5.34537	0.335213	15.9462	10.6008
	2	2.55849	3.0111	0.3051	9.86922	6.85812		3.11667	3.78251	0.283753	13.3303	9.54781		2.57564	2.78	0.2605	10.6718	7.89179		0	2.7225	0.304487	8.94126	6.21877		4.60507	5.45691	0.349883	15.5964	10.1395
	3	2.53181	3.04	0.2999	10.1367	7.09671		3.24873	3.61	0.283805	12.72	9.11		2.67345	3.14	0.2952	10.6369	7.49686		0	2.63303	0.328268	8.02098	5.38795		4.72744	5.99772	0.363135	16.5165	10.5188
	4	2.03154	2.44	0.297	8.21549	5.77549		2.92342	3.20813	0.264381	12.1345	8.92635		2.75496	3.29	0.2811	11.704	8.41402		0	3.31867	0.314529	10.5512	7.23255		4.40322	5.12852	0.293799	17.4559	12.3273
	Mean	2.40728	2.91027	0.2956	9.86384	6.95357		3.26815	3.8095	0.297842	12.7717	8.9622		2.7468	3.2025	0.298175	10.782	7.57947		0	2.67157	0.326982	8.27314	5.60157		4.59814	5.48213	0.335508	16.3787	10.8966
	(+) nutrients							HdYield	QdYield	HI	Biomass	Stubble		HdYield	QdYield	HI	Biomass	Stubble		HdYield	QdYield	HI	Biomass	Stubble		HdYield	QdYield	HI	Biomass	Stubble
	rep 1			future (+) nutrient side				2.91018	4.01381	0.303142	13.2407	9.22687		2.61139	3.59	0.302455	11.8695	8.27954		0	5.014	0.320366	15.6509	10.6369		4.4561	6.24284	0.346798	18.0014	11.7585
	2			same as (-) nutrients				1.98618	2.2468	0.212342	10.581	8.33423		2.30128	3.03	0.238838	12.6864	9.65642		0	3.89046	0.27095	14.3586	10.4681		4.3495	4.62725	0.33516	13.8061	9.17882
	3			in 2007				1.85154	2.39225	0.219196	10.9137	8.5215		2.49714	3.21	0.218326	14.7028	11.4928		0	4.49611	0.288797	15.5684	11.0723		4.14926	4.89759	0.357383	13.704	8.80645
	4							2.25543	3.08544	0.26199	11.7769	8.69147		2.12175	2.58	0.239859	10.7563	8.17633		0	3.92204	0.282172	13.8994	9.97739		4.02441	3.54702	0.251592	14.0983	10.5513
	Mean							2.25083	2.93457	0.249168	11.6281	8.69352		2.38289	3.1025	0.249869	12.5038	9.40127		0	4.33065	0.290571	14.8693	10.5387		4.24482	4.82868	0.322733	14.9024	10.0738
																						crop ploughed in, no header yield
	Nutrient concentration in stubble (%)
		2007 W						2008 W						2009 W						2010 C						2011 W
	(-) nutrients		%C	%N	%P	%S			%C	%N	%P	%S			%C	%N	%P	%S			%C	%N	%P	%S			%C	%N	%P	%S
	Rep 1	stubble	45.15	0.569	0.0561	0.0613322		stubble	45.72	0.4597	0.0432	0.0706		stubble	45.41	0.3767	0.0408	0.0533		stubble	41.38	1.432	0.172	0.5564		stubble	46.12	0.4367	0.0546	0.0622
	2	stubble	44.53	0.6639	0.082967	0.0957		stubble	45.42	0.7917	0.0861	0.118		stubble	45.39	0.7645	0.0666	0.102		stubble	43.5	0.4237	0.0555	0.5578		stubble	45.18	0.4647	0.0479	0.0789
	3	stuuble	45.04	1.082	0.0969266	0.100046		stuuble	45.26	0.8539	0.0983	0.136		stuuble	45.12	0.6611	0.076	0.0889		stuuble	43.22	0.6275	0.0687	0.5625		stuuble	45.81	0.4797	0.0523	0.0764
	4	stubble	43.44	0.9418	0.0493548	0.0787097		stubble	45.23	0.8653	0.13	0.134		stubble	45.41	0.5577	0.069	0.0817		stubble	43.11	0.5731	0.0758	0.5724		stubble	45.59	0.5453	0.0696	0.0866
	Mean		44.54	0.814175	0.0713371	0.0839469			45.4075	0.74265	0.0894	0.11465			45.3325	0.59	0.0631	0.081475			42.8025	0.764075	0.093	0.562275			45.675	0.4816	0.0561	0.076025
	(+) nutrients								%C	%N	%P	%S			%C	%N	%P	%S			%C	%N	%P	%S			%C	%N	%P	%S
	rep 1			future (+) nutrient side				stubble	45.72	0.5906	0.0952	0.109		stubble	45.24	0.6062	0.11	0.108		stubble	42.73	0.4777	0.0668	0.4494		stubble	45.22	0.5771	0.1038	0.1065
	2			same as (-) nutrients				stubble	44.56	1.376	0.214	0.211		stubble	44.96	1.398	0.203	0.186		stubble	42.38	0.6726	0.0889	0.5074		stubble	45.03	0.6728	0.1188	0.1291
	3			in 2007				stuuble	45.04	1.144	0.18	0.173		stuuble	44.91	1.279	0.195	0.213		stuuble	41.58	1.443	0.1423	0.5588		stuuble	45.88	0.6701	0.1031	0.1444
	4							stubble	44.62	0.9381	0.162	0.177		stubble	44.94	1.113	0.136	0.141		stubble	42.27	1.103	0.0967	0.5237		stubble	45.41	0.6598	0.1112	0.1358
	Mean								44.985	1.01218	0.1628	0.1675			45.0125	1.09905	0.161	0.162			42.24	0.924075	0.098675	0.509825			45.385	0.64495	0.109225	0.12895
	Nutrient concentration in grain (%)
		2007 W						2008 W						2009 W						2010 C						2011 W
	(-) nutrients		%C	%N	%P	%S			%C	%N	%P	%S			%C	%N	%P	%S			%C	%N	%P	%S			%C	%N	%P	%S
	Rep 1	grain	43.71	2.923	0.243	0.171		grain	43.51	2.722	0.366	0.168		grain	44.03	2.197	0.313	0.138		grain	59.49	3.698	0.7394	0.3569		grain	44.86	2.208	0.302	0.1361
	2	grain	43.67	3.179	0.292	0.164		grain	43.51	2.29	0.259	0.127		grain	44.26	2.897	0.33	0.168		grain	58.24	3.88	0.8257	0.4006		grain	44.41	2.254	0.3264	0.1464
	3	grain	43.69	3.002	0.288	0.164		grain	43.78	3.191	0.387	0.188		grain	44.05	2.576	0.338	0.158		grain	60.95	3.107	0.7884	0.3169		grain	44.79	2.365	0.3034	0.1363
	4	grain	43.82	3.157	0.298	0.167		grain	43.71	3.146	0.339	0.164		grain	44.06	2.556	0.34	0.15		grain	62.82	3.67	0.7995	0.3291		grain	44.75	2.386	0.3304	0.1462
	Mean		43.7225	3.06525	0.28025	0.1665			43.6275	2.83725	0.33775	0.16175			44.1	2.5565	0.33025	0.1535			60.375	3.58875	0.78825	0.350875			44.7025	2.30325	0.31555	0.14125
	(+) nutrients								%C	%N	%P	%S			%C	%N	%P	%S			%C	%N	%P	%S			%C	%N	%P	%S
	1			future (+) nutrient side				grain	43.81	3.173	0.351	0.18		grain	44.14	3.072	0.379	0.176		grain	59.35	3.695	0.7996	0.3691		grain	45.1	2.537	0.3458	0.1508
	2			same as (-) nutrients				grain	43.68	2.784	0.331	0.158		grain	44.4	3.271	0.388	0.188		grain	57.06	4.856	0.7985	0.4027		grain	45.11	2.683	0.3609	0.1581
	3			in 2007				grain	43.77	3.329	0.349	0.171		grain	44.4	3.25	0.374	0.186		grain	58.12	3.857	0.7097	0.4446		grain	45.14	2.72	0.3707	0.1675
	4							grain	43.9	2.954	0.335	0.164		grain	44.27	2.96	0.362	0.175		grain	57.23	4.387	0.9027	0.4637		grain	44.62	2.758	0.3818	0.1617
	Mean								43.79	3.06	0.3415	0.16825			44.3025	3.13825	0.37575	0.18125			57.94	4.19875	0.802625	0.420025			44.9925	2.6745	0.3648	0.159525
	Nutrients removed in grain (kg/ha)
				2007 W						2008 W						2009 W						2009 C						2011 W
	(-) nutrients			N	P	S				N	P	S				N	P	S				N	P	S				N	P	S
	Rep 1			73.2877	6.09268	4.28744				102.994	13.8486	6.35674				65.5404	9.33734	4.11678				0	0	0				102.823	14.0636	6.33794
	2			81.3344	7.47079	4.19592				71.3718	8.07218	3.95817				74.6163	8.49961	4.32707				0	0	0				103.798	15.0309	6.74182
	3			76.0048	7.2916	4.15216				103.667	12.5726	6.10762				68.868	9.03625	4.22405				0	0	0				111.804	14.343	6.4435
	4			64.1356	6.05398	3.39267				91.9708	9.9104	4.79441				70.4167	9.36685	4.13243				0	0	0				105.061	14.5482	6.43751
	Mean			73.6906	6.72726	4.00705				92.501	11.1009	5.30423				69.8603	9.06001	4.20008				0	0	0				105.871	14.4965	6.49019
	(+) nutrients									N	P	S				N	P	S				N	P	S				N	P	S
	1									92.3399	10.2147	5.23832				80.2218	9.89715	4.59604				0	0	0				113.051	15.4092	6.7198
	2				future (+) nutrient side					55.2954	6.57427	3.13817				75.275	8.92898	4.32641				0	0	0				116.697	15.6973	6.87656
	3				same as (-) nutrients					61.6378	6.46187	3.16613				81.157	9.33929	4.64468				0	0	0				112.86	15.3813	6.95001
	4				in 2007					66.6254	7.55569	3.6989				62.8038	7.68074	3.71306				0	0	0				110.993	15.3652	6.50748
	Mean									68.9746	7.70164	3.81038				74.8644	8.96154	4.32005				0	0	0				113.4	15.4633	6.76346
																							crop ploughed in 2009
																							no nutrients removed
																													TOTAL nutrients removed
																											(-) nutrients	N	P	S
																											Rep 1	344.645	43.3423	21.0989
																											2	331.121	39.0735	19.223
																											3	360.344	43.2435	20.9273
																											4	331.584	39.8795	18.757
																											Mean	341.923	41.3847	20.0016
																											(+) nutrients	N	P	S
																											1	358.901	41.6138	20.8416
																											2	328.602	38.6714	18.5371
																											3	331.659	38.4741	18.913
																											4	304.558	36.6556	17.3121
																											Mean	330.93	38.8537	18.9009
