# Supplementary material for: Inorganic Nutrients Increase Humification Efficiency and C-Sequestration in an Annually Cropped Soil
Source: PLoS One. 2016 May 4;11(5):e0153698. doi: 10.1371/journal.pone.0153698 (PMC4856260; doi:10.1371/journal.pone.0153698)
Supplement: S2 Table — (XLSX) [file pone.0153698.s002.xlsx]

## Sheet: Supplementary nutrient addition
	2008-2012 supplmentary nutrients required (kg/ha) to facilitate humification of 30% of stubble-C incoporated in (+) nutrient plots and actual nutrients applied
			N	P	S
		Total nutrients required	265.898	86.5818	29.2401
		Total actual nutrients applied	265.898	223.131	195.24
	Nutrients additions for Harden (2008)								Nutrients additions for Harden (2009)								Nutrients additions for Harden (2010)								Nutrients additions for Harden (2011)								Nutrients additions for Harden (2012)
	This spreadsheet assumes only 30% of the newly added stubble carbon will be humified								This spreadsheet assumes only 30% of the newly added stubble carbon will be humified								This spreadsheet assumes only 30% of the newly added stubble carbon will be humified								This spreadsheet assumes only 30% of the newly added stubble carbon will be humified								This spreadsheet assumes only 30% of the newly added stubble carbon will be humified
			%C	%N	%P	%S					%C	%N	%P	%S					%C	%N	%P	%S					%C	%N	%P	%S					%C	%N	%P	%S
		nutrient concentration in stubble is	45.15	0.569	0.0561	0.0613322				nutrient concentration in stubble is	45.72	0.5906	0.0952	0.109				nutrient concentration in stubble is	45.24	0.6062	0.11	0.158				nutrient concentration in stubble is	42.73	0.4777	0.0668	0.4494				nutrient concentration in stubble is	45.22	0.5871	0.1038	0.1165
		nutrient concentration in fertiliser (Granuloc 15) is		14.3	12	10.5				nutrient concentration in fertiliser (Granuloc 15) is		14.3	12	10.5				nutrient concentration in fertiliser (Granuloc 15) is		14.3	12	10.5				nutrient concentration in fertiliser (Granuloc 15) is		14.3	12	10.5				nutrient concentration in fertiliser (Granuloc 15) is		14.3	12	10.5
		estimated stubble load	7	t/ha						estimated stubble load	9	t/ha						estimated stubble load	10	t/ha						estimated stubble load	11	t/ha						estimated stubble load	11	t/ha
		plot size	60	sq m						plot size	60	sq m						plot size	60	sq m						plot size	60	sq m						plot size	60	sq m
		calculated stubble load per plot is	42	kg						calculated stubble load per plot is	54	kg						calculated stubble load per plot is	60	kg						calculated stubble load per plot is	66	kg						calculated stubble load per plot is	66	kg
				C	N	P	S					C	N	P	S					C	N	P	S					C	N	P	S					C	N	P	S
			humus ratios	10000	833	200	143				humus ratios	10000	833	200	143				humus ratios	10000	833	200	143				humus ratios	10000	833	200	143				humus ratios	10000	833	200	143
			1 unit C needs	1	0.0833	0.02	0.0143				1 unit C needs	1	0.0833	0.02	0.0143				1 unit C needs	1	0.0833	0.02	0.0143				1 unit C needs	1	0.0833	0.02	0.0143				1 unit C needs	1	0.0833	0.02	0.0143
			1 unit N needs	12.0048	1	0.240096	0.171669				1 unit N needs	12.0048	1	0.240096	0.171669				1 unit N needs	12.0048	1	0.240096	0.171669				1 unit N needs	12.0048	1	0.240096	0.171669				1 unit N needs	12.0048	1	0.240096	0.171669
			1 unit P needs	50	4.165	1	0.715				1 unit P needs	50	4.165	1	0.715				1 unit P needs	50	4.165	1	0.715				1 unit P needs	50	4.165	1	0.715				1 unit P needs	50	4.165	1	0.715
			1 unit S needs	69.9301	5.82517	1.3986	1				1 unit S needs	69.9301	5.82517	1.3986	1				1 unit S needs	69.9301	5.82517	1.3986	1				1 unit S needs	69.9301	5.82517	1.3986	1				1 unit S needs	69.9301	5.82517	1.3986	1
				C	N	P	S					C	N	P	S					C	N	P	S					C	N	P	S					C	N	P	S
		wt stubble on plot (kg)	42							wt stubble on plot (kg)	54							wt stubble on plot (kg)	60							wt stubble on plot (kg)	66							wt stubble on plot (kg)	66
		stubble nutrient conc (%)		45.15	0.569	0.0561	0.0613322			stubble nutrient conc (%)		45.72	0.5906	0.0952	0.109			stubble nutrient conc (%)		45.24	0.6062	0.11	0.158			stubble nutrient conc (%)		42.73	0.4777	0.0668	0.4494			stubble nutrient conc (%)		45.22	0.5871	0.1038	0.1165
		wt nutrients already in stubble		18.963	0.23898	0.023562	0.0257595			wt nutrients already in stubble		24.6888	0.318924	0.051408	0.05886			wt nutrients already in stubble		27.144	0.36372	0.066	0.0948			wt nutrients already in stubble		28.2018	0.315282	0.044088	0.296604			wt nutrients already in stubble		29.8452	0.387486	0.068508	0.07689
		humification required (%)	30							humification required (%)	30							humification required (%)	30							humification required (%)	30							humification required (%)	30
			Carbon to be humified & nutrients required	5.6889	0.473885	0.113778	0.0813513				Carbon to be humified & nutrients required	7.40664	0.616973	0.148133	0.105915				Carbon to be humified & nutrients required	8.1432	0.678329	0.162864	0.116448				Carbon to be humified & nutrients required	8.46054	0.704763	0.169211	0.120986				Carbon to be humified & nutrients required	8.95356	0.745832	0.179071	0.128036
			C remaining	13.2741							C remaining	17.2822							C remaining	19.0008							C remaining	19.7413							C remaining	20.8916
			Nutrients required per plot		0.234905	0.090216	0.0555918	kg			Nutrients required per plot		0.298049	0.0967248	0.047055	kg			Nutrients required per plot		0.314609	0.096864	0.0216478	kg			Nutrients required per plot		0.389481	0.125123	-0.175618	kg			Nutrients required per plot		0.358346	0.110563	0.0511459	kg
				wt fertiliser required per plot to supply exact nutrients	1.64269	0.7518	0.529445	kg				wt fertiliser required per plot to supply exact nutrients	2.08426	0.80604	0.448142	kg				wt fertiliser required per plot to supply exact nutrients	2.20006	0.8072	0.206169	kg				wt fertiliser required per plot to supply exact nutrients	2.72364	1.04269	-1.67256	kg				wt fertiliser required per plot to supply exact nutrients	2.50591	0.92136	0.487104	kg
				exact nutrients required per ha	39.1509	15.036	9.26529	kg				exact nutrients required per ha	49.6749	16.1208	7.84249	kg				exact nutrients required per ha	52.4348	16.144	3.60796	kg				exact nutrients required per ha	64.9135	20.8538	-29.2697	kg				exact nutrients required per ha	59.7243	18.4272	8.52432	kg
				actual wt of fertiliser that will be applied to each plot			1.64269	kg				actual wt of fertiliser that will be applied to each plot			2.08426	kg				actual wt of fertiliser that will be applied to each plot			2.20006	kg				actual wt of fertiliser that will be applied to each plot			2.72364	kg				actual wt of fertiliser that will be applied to each plot			2.50591	kg
				actual nutrients applied per plot (assuming required N is supplied as per fertiliser above)	0.234905	0.197123	0.172483	kg				actual nutrients applied per plot (assuming required N is supplied as per fertiliser above)	0.298049	0.250111	0.218847	kg				actual nutrients applied per plot (assuming required N is supplied as per fertiliser above)	0.314609	0.264007	0.231006	kg				actual nutrients applied per plot (assuming required N is supplied as per fertiliser above)	0.389481	0.326837	0.285983	kg				actual nutrients applied per plot (assuming required N is supplied as per fertiliser above)	0.358346	0.30071	0.263121	kg
				actual nutrients applied per ha (assuming required N is supplied as per fertiliser above)	39.1509	32.8539	28.7472	kg				actual nutrients applied per ha (assuming required N is supplied as per fertiliser above)	49.6749	41.6852	36.4745	kg				actual nutrients applied per ha (assuming required N is supplied as per fertiliser above)	52.4348	44.0012	38.501	kg				actual nutrients applied per ha (assuming required N is supplied as per fertiliser above)	64.9135	54.4729	47.6638	kg				actual nutrients applied per ha (assuming required N is supplied as per fertiliser above)	59.7243	50.1183	43.8535	kg
																					28.3478	23.7884	20.8148
																																				Total of acttual nutrients required (2008-2012)	265.898	86.5818	29.2401
																																				Total of actual nutrients applied (2008-2012)	265.898	223.131	195.24
