# Supplementary material for: Inorganic Nutrients Increase Humification Efficiency and C-Sequestration in an Annually Cropped Soil
Source: PLoS One. 2016 May 4;11(5):e0153698. doi: 10.1371/journal.pone.0153698 (PMC4856260; doi:10.1371/journal.pone.0153698)
Supplement: S3 Table — (XLSX) [file pone.0153698.s003.xlsx]

## Sheet: Soil nutrient data
	Soil nutrient (CNPS) concentrations (%), loads (t/ha) and ratios (C:N, C:P, C:S) in 2006 and 2012
	BD = bulk density		gravel is fraction %
		Replicate 1															Sum for combined depths					Replicate 2															Sum for combined depths					Replicate 3
	2006	depth (cm)	increment (cm)	gravel	BD	% C	% N	% P	% S	C:N	C:P	C:S	C t/ha	N t/ha	P t/ha	S t/ha	C t/ha	N t/ha	P t/ha	S t/ha		depth	increment (cm)	gravel	BD	% C	% N	% P	% S	C:N	C:P	C:S	C t/ha	N t/ha	P t/ha	S t/ha	C t/ha	N t/ha	P t/ha	S t/ha		depth	increment (cm)	gravel	BD	% C	% N	% P	% S
		0-10	10	0.0420008	1.275	0.8907	0.0771	0.0292381	0.0104808	11.5525	30.4637	84.9843	10.8794	0.941737	0.357128	0.128017	10.8794	0.941737	0.357128	0.128017		0-10	10	0.0333673	1.43	1.081	0.1034	0.0271115	0.0113498	10.4545	39.8724	95.2441	14.9425	1.42928	0.374758	0.156886	14.9425	1.42928	0.374758	0.156886		0-10	10	0.0453804	1.315	0.976	0.0964	0.0327431	0.0101988
		10-20	10	0.0508747	1.6	0.442225	0.0409	0.0143906	0.0059175	10.8123	30.7301	74.7317	6.71563	0.621108	0.218536	0.0898631						10-20	10	0.0434237	1.55	0.5854	0.052	0.0162714	0.00683961	11.2577	35.9772	85.5897	8.67969	0.771	0.241255	0.10141						10-20	10	0.054594	1.65	0.5037	0.0502162	0.017698	0.00608801
		20-30	10	0.073064	1.61	0.3333	0.0336	0.0127018	0.00708866	9.91964	26.2404	47.0187	4.97406	0.501435	0.189557	0.105789	11.6897	1.12254	0.408093	0.195652		20-30	10	0.0513084	1.61	0.3668	0.0349	0.0123875	0.00610648	10.51	29.6104	60.0674	5.60248	0.53306	0.189206	0.0932699	14.2822	1.30406	0.430462	0.19468		20-30	10	0.0645341	1.61	0.327856	0.0349003	0.016254	0.00553862
		30-40	10	0.117339	1.68	0.354	0.0381	0.0146596	0.00848321	9.29134	24.148	41.7295	5.24936	0.564974	0.217383	0.125795						30-40	10	0.0699839	1.68	0.288	0.0284	0.0109502	0.00619178	10.1408	26.3008	46.5133	4.49979	0.443729	0.171089	0.0967421						30-40	10	0.0931895	1.68	0.2575	0.0289	0.0171791	0.00589684
		40-50	10	0.128549	1.61	0.31	0.034	0.0156	0.00899298	9.11765	19.8718	34.4713	4.34941	0.477032	0.218874	0.126175						40-50	10	0.0985101	1.61	0.28	0.0311	0.0123	0.00807512	9.00322	22.7642	34.6744	4.06392	0.451385	0.178522	0.117202						40-50	10	0.106192	1.61	0.28	0.0309	0.019	0.0078433
		50-60	10	0.126507	1.7	0.2424	0.0286	0.0166533	0.00912106	8.47552	14.5556	26.5759	3.59949	0.424693	0.247292	0.135442	13.1983	1.4667	0.683549	0.387412		50-60	10	0.136082	1.7	0.2086	0.025	0.0135524	0.00889776	8.344	15.3921	23.4441	3.06363	0.367165	0.199039	0.130678	11.6273	1.26228	0.54865	0.344622		50-60	10	0.0980066	1.7	0.1984	0.0249	0.0206439	0.00923431
		60-70	10	0.13226	1.76	0.23	0.0279	0.0157	0.00854615	8.24373	14.6497	26.9127	3.51261	0.426095	0.239774	0.130519						60-70	10	0.16529	1.76	0.17	0.0228	0.0152	0.00783887	7.45614	11.1842	21.6868	2.49745	0.334952	0.223302	0.11516						60-70	10	0.125151	1.76	0.203	0.0236	0.0202	0.00880445
		70-80	10	0.150066	1.76	0.1969	0.0269	0.014982	0.00774826	7.3197	13.1425	25.4122	2.9454	0.402393	0.224113	0.115905						70-80	10	0.128296	1.76	0.1595	0.0216	0.016698	0.0083866	7.38426	9.55202	19.0184	2.44705	0.331387	0.256181	0.128667						70-80	10	0.141579	1.76	0.148	0.0181	0.0180011	0.00710635
		80-90	10	0.170625	1.77	0.195	0.0259	0.014	0.007625	7.52896	13.9286	25.5738	2.86259	0.38021	0.205519	0.111934	9.32059	1.2087	0.669406	0.358358		80-90	10	0.127798	1.77	0.15	0.0211	0.015	0.00856598	7.109	10	17.5111	2.3157	0.325741	0.23157	0.132241	7.2602	0.992081	0.711052	0.376069		80-90	10	0.117398	1.77	0.136	0.0165	0.0155	0.00845883
		90-100	10	0.164284	1.77	0.1645	0.0243	0.0123265	0.00709598	6.76955	13.3452	23.1821	2.43331	0.35945	0.182336	0.104965						90-100	10	0.124862	1.77	0.1253	0.0177	0.0135776	0.00727052	7.0791	9.22846	17.234	1.94089	0.274172	0.210316	0.11262						90-100	10	0.0923532	1.77	0.1016	0.0148	0.0130694	0.00820948
		100-110	10	0.211107	1.78	0.14	0.021	0.0121	0.00589333	6.66667	11.5702	23.7557	1.96592	0.294888	0.169912	0.0827559						100-110	10	0.102523	1.78	0.1468	0.0221	0.014	0.0077218	6.64253	10.4857	19.0111	2.34514	0.35305	0.223651	0.123357						100-110	10	0.0997098	1.78	0.117	0.017	0.0134	0.00838589
		110-120	10	0.223153	1.8	0.1413	0.0193	0.0117	0.00642234	7.32124	12.0769	22.0013	1.97583	0.269877	0.163604	0.0898051	6.37507	0.924215	0.515852	0.277526		110-120	10	0.0881802	1.8	0.1239	0.0181	0.0135	0.00679981	6.8453	9.17778	18.2211	2.03354	0.297071	0.221572	0.111604	6.31957	0.924293	0.655539	0.34758		110-120	10	0.0984877	1.8	0.1069	0.0181	0.0126398	0.00676715
		120-130	10	0.237239	1.8	0.0921	0.0145	0.0095	0.00400411	6.35172	9.69474	23.0013	1.2645	0.199081	0.130432	0.0549753						120-130	10	0.118107	1.8	0.1217	0.0181	0.0113	0.00670968	6.72376	10.7699	18.138	1.93187	0.287321	0.179377	0.10651						120-130	10	0.111984	1.8	0.1183	0.0175	0.0121	0.0060565
		130-140	10	0.27303	1.8	0.072	0.0116	0.0085	0.00426498	6.2069	8.47059	16.8817	0.942153	0.151791	0.111226	0.0558092						130-140	10	0.114458	1.8	0.104	0.0155	0.0107	0.00430862	6.70968	9.71963	24.1376	1.65773	0.247066	0.170555	0.0686784						130-140	10	0.17762	1.8	0.0922	0.0179	0.00992947	0.00518727
		140-150	10	0.246377	1.86	0.0799	0.0143	0.0083	0.00352187	5.58741	9.62651	22.6868	1.11999	0.200449	0.116344	0.0493674						140-150	10	0.163751	1.86	0.0889	0.016	0.0105	0.00418236	5.55625	8.46667	21.2559	1.38277	0.248868	0.163319	0.0650534						140-150	10	0.213717	1.86	0.09	0.0176	0.0098	0.00475506
		150-160	10	0.287922	1.86	0.0656	0.0126	0.0075	0.00283155	5.20635	8.74667	23.1676	0.868849	0.166883	0.0993349	0.0375028	4.1955	0.718203	0.457338	0.197655		150-160	10	0.169845	1.86	0.0928	0.015	0.0101	0.00373808	6.18667	9.18812	24.8256	1.43291	0.231613	0.155953	0.0577193	6.40529	1.01487	0.669205	0.297961		150-160	10	0.256275	1.86	0.0827	0.0174	0.00967101	0.00403737
				0.16465	1.71469	0.24687	0.0281625	0.0136157	0.00675236	7.8982	16.3288	33.8804	55.6586	6.38209	3.09137	1.54462								0.108487	1.72125	0.255794	0.028925	0.0139468	0.00706143	7.96269	16.7306	34.1608	60.8371	6.92686	3.38967	1.7178								0.118511	1.72031	0.233697	0.0277948	0.0161143	0.00703551
		Replicate 1																				Replicate 2																				Replicate 3
	2012 (-) supp nutrients	depth	increment (cm)	gravel	BD	% C	% N	% P	% S	C:N	C:P	C:S	C t/ha	N t/ha	P t/ha	S t/ha	C t/ha	N t/ha	P t/ha	S t/ha		depth	increment (cm)	gravel	BD	% C	% N	% P	% S	C:N	C:P	C:S	C t/ha	N t/ha	P t/ha	S t/ha	C t/ha	N t/ha	P t/ha	S t/ha		depth	increment (cm)	gravel	BD	% C	% N	% P	% S
		0-10	10	0.0420008	1.21125	0.6594	0.0577	0.0226	0.0073	11.4281	29.177	90.3288	7.65152	0.669537	0.262245	0.0847075	7.65152	0.669537	0.262245	0.0847075		0-10	10	0.0333673	1.3585	0.91945	0.0814	0.0258	0.0096	11.2955	35.6376	95.776	12.0739	1.06892	0.338798	0.126064	12.0739	1.06892	0.338798	0.126064		0-10	10	0.0453804	1.24925	0.839	0.072525	0.0263	0.0091
		10-20	10	0.0508747	1.52	0.40685	0.03975	0.0166	0.00595	10.2352	24.509	68.3782	5.8695	0.573461	0.239483	0.0858389						10-20	10	0.0434237	1.4725	0.5368	0.0462	0.01795	0.00675	11.619	29.9053	79.5259	7.56114	0.650754	0.252836	0.0950777						10-20	10	0.054594	1.5675	0.52225	0.04696	0.0206	0.00655
		20-30	10	0.073064	1.61	0.26905	0.03095	0.0119	0.0057	8.69305	22.6092	47.2018	4.01521	0.461888	0.177592	0.0850649	9.88472	1.03535	0.417075	0.170904		20-30	10	0.0513084	1.61	0.30065	0.03035	0.01315	0.00615	9.9061	22.8631	48.8862	4.59211	0.463564	0.200852	0.0939347	12.1533	1.11432	0.453689	0.189012		20-30	10	0.0645341	1.61	0.298	0.030995	0.01615	0.0054
		30-40	10	0.117339	1.68	0.2997	0.0352	0.01335	0.0081	8.5142	22.4494	37	4.44417	0.521971	0.197963	0.120113						30-40	10	0.0699839	1.68	0.2401	0.0274	0.01165	0.0061	8.76277	20.6094	39.3607	3.75139	0.428105	0.182023	0.0953081						30-40	10	0.0931895	1.68	0.2759	0.0282	0.0134	0.00655
		40-50	10	0.128549	1.61	0.27425	0.03045	0.01625	0.00965	9.00657	16.8769	28.4197	3.84782	0.427224	0.227993	0.135393						40-50	10	0.0985101	1.61	0.2662	0.03	0.0135	0.0071	8.87333	19.7185	37.493	3.86362	0.43542	0.195939	0.103049						40-50	10	0.106192	1.61	0.26425	0.02784	0.014605	0.007318
		50-60	10	0.126507	1.7	0.197	0.0237	0.01655	0.00935	8.31224	11.9033	21.0695	2.92533	0.351931	0.245757	0.138842	11.2173	1.30113	0.671714	0.394347		50-60	10	0.136082	1.7	0.1904	0.02515	0.0153	0.0084	7.57058	12.4444	22.6667	2.79633	0.369368	0.224705	0.123368	10.4113	1.23289	0.602667	0.321725		50-60	10	0.0980066	1.7	0.20115	0.024405	0.0166	0.0071
		60-70	10	0.13226	1.76	0.21165	0.02625	0.016	0.0082	8.06286	13.2281	25.811	3.23237	0.400896	0.244356	0.125232						60-70	10	0.16529	1.76	0.1655	0.0235	0.01585	0.0086	7.04255	10.4416	19.2442	2.43134	0.345236	0.232851	0.126342						60-70	10	0.125151	1.76	0.2037	0.02513	0.01712	0.007383
		70-80	10	0.150066	1.76	0.19495	0.02705	0.0152	0.0075	7.20702	12.8257	25.9933	2.91623	0.404637	0.227374	0.112191						70-80	10	0.128296	1.76	0.13925	0.02175	0.0164	0.00875	6.4023	8.49085	15.9143	2.13637	0.333688	0.251609	0.134242						70-80	10	0.141579	1.76	0.16455	0.02076	0.015	0.00625
		80-90	10	0.170625	1.77	0.18345	0.024	0.0134	0.0066	7.64375	13.6903	27.7955	2.69303	0.352318	0.196711	0.0968875	8.84163	1.15785	0.668441	0.334311		80-90	10	0.127798	1.77	0.15535	0.0245	0.0157	0.00835	6.34082	9.8949	18.6048	2.39829	0.37823	0.242376	0.128907	6.966	1.05715	0.726836	0.389491		80-90	10	0.117398	1.77	0.1384	0.019665	0.013565	0.005996
		90-100	10	0.164284	1.77	0.1444	0.0234	0.01175	0.0059	6.17094	12.2894	24.4746	2.13599	0.346137	0.173808	0.0872739						90-100	10	0.124862	1.77	0.11785	0.01945	0.01365	0.0082	6.05913	8.6337	14.372	1.82549	0.301279	0.211438	0.127018						90-100	10	0.0923532	1.77	0.1463	0.02252	0.0125	0.0056
		100-110	10	0.211107	1.78	0.133	0.0196	0.01055	0.00515	6.78571	12.6066	25.8252	1.86762	0.275229	0.148146	0.0723178						100-110	10	0.102523	1.78	0.1468	0.0244	0.0129	0.00805	6.01639	11.3798	18.236	2.34514	0.389792	0.206079	0.1286						100-110	10	0.0997098	1.78	0.14107	0.0238125	0.013165	0.0063965
		110-120	10	0.223153	1.8	0.1413	0.01925	0.0104	0.00465	7.34026	13.5865	30.3871	1.97583	0.269177	0.145426	0.0650221	5.97945	0.890543	0.46738	0.224614		110-120	10	0.0881802	1.8	0.1239	0.02155	0.01145	0.00755	5.74942	10.821	16.4106	2.03354	0.353695	0.187926	0.123916	6.20417	1.04477	0.605443	0.379533		110-120	10	0.0984877	1.8	0.138435	0.024095	0.01292	0.00619
		120-130	10	0.237239	1.8	0.0921	0.01445	0.0121	0.004	6.3737	7.61157	23.025	1.2645	0.198394	0.166129	0.0549188						120-130	10	0.118107	1.8	0.12165	0.0219	0.01225	0.00695	5.55479	9.93061	17.5036	1.93108	0.347642	0.194457	0.110325						120-130	10	0.111984	1.8	0.1183	0.021725	0.01229	0.0054055
		130-140	10	0.27303	1.8	0.104	0.01545	0.0114	0.00375	6.73139	9.12281	27.7333	1.36089	0.20217	0.149174	0.0490705						130-140	10	0.114458	1.8	0.09715	0.0201	0.0124	0.0056	4.83333	7.83468	17.3482	1.54855	0.320389	0.197653	0.0892626						130-140	10	0.17762	1.8	0.10165	0.019875	0.01181	0.0053705
		140-150	10	0.246377	1.86	0.07985	0.0143	0.0137	0.00315	5.58392	5.82847	25.3492	1.11929	0.200449	0.192038	0.0441547						140-150	10	0.163751	1.86	0.08885	0.01935	0.01125	0.0048	4.59173	7.89778	18.5104	1.38199	0.300974	0.174985	0.0746603						140-150	10	0.213717	1.86	0.0893	0.01832	0.011695	0.0049625
		150-160	10	0.287922	1.86	0.0656	0.0125865	0.01775	0.0027941	5.21193	3.69577	23.478	0.868849	0.166704	0.235093	0.0370069	4.61353	0.767717	0.742434	0.185151		150-160	10	0.169845	1.86	0.09275	0.02065	0.0102	0.0042	4.49153	9.09314	22.0833	1.43214	0.318854	0.157497	0.0648517	6.29376	1.28786	0.724592	0.339099		150-160	10	0.256275	1.86	0.0888	0.01827	0.011255	0.0043815
				0.16465	1.7057	0.216034	0.0258867	0.0143437	0.00610901	7.7063	14.5006	34.5169	48.1882	5.82212	3.22929	1.39403								0.108487	1.71194	0.231416	0.0286656	0.0143375	0.00719687	7.19433	14.7248	31.371	54.1025	6.80591	3.45202	1.74493								0.118511	1.71105	0.233191	0.0279436	0.0149359	0.00624709
		Replicate 1																				Replicate 2																				Replicate 3
	2012 (+) supp nutrients	depth	increment (cm)	gravel	BD	% C	% N	% P	% S	C:N	C:P	C:S	C t/ha	N t/ha	P t/ha	S t/ha	C t/ha	N t/ha	P t/ha	S t/ha		depth	increment (cm)	gravel	BD	% C	% N	% P	% S	C:N	C:P	C:S	C t/ha	N t/ha	P t/ha	S t/ha	C t/ha	N t/ha	P t/ha	S t/ha		depth	increment (cm)	gravel	BD	% C	% N	% P	% S
		0-10	10	0.0420008	1.21125	0.885	0.0758	0.0396	0.0106	11.6755	22.3485	83.4906	10.2693	0.879565	0.459509	0.123	10.2693	0.879565	0.459509	0.123		0-10	10	0.0333673	1.3585	1.03225	0.09255	0.0415	0.01185	11.1534	24.8735	87.1097	13.5552	1.21534	0.544966	0.155611	13.5552	1.21534	0.544966	0.155611		0-10	10	0.0453804	1.24925	0.93575	0.0811	0.0405	0.01055
		10-20	10	0.0508747	1.52	0.5015	0.04545	0.0287	0.0069	11.0341	17.4739	72.6812	7.23499	0.655694	0.414046	0.0995443						10-20	10	0.0434237	1.4725	0.5656	0.0524	0.0261	0.00735	10.7939	21.6705	76.9524	7.96681	0.738085	0.367634	0.103529						10-20	10	0.054594	1.5675	0.5471	0.0499	0.029	0.00735
		20-30	10	0.073064	1.61	0.31025	0.0322	0.01515	0.00555	9.63509	20.4785	55.9009	4.63007	0.480542	0.226094	0.0828264	11.8651	1.13624	0.64014	0.182371		20-30	10	0.0513084	1.61	0.3431	0.03155	0.01505	0.0064	10.8748	22.7973	53.6094	5.24049	0.481893	0.229873	0.0977532	13.2073	1.21998	0.597507	0.201282		20-30	10	0.0645341	1.61	0.33605	0.0339	0.01875	0.0057
		30-40	10	0.117339	1.68	0.33465	0.03575	0.014	0.008	9.36084	23.9036	41.8312	4.96243	0.530126	0.207602	0.11863						30-40	10	0.0699839	1.68	0.31055	0.03085	0.0129	0.00625	10.0665	24.0736	49.688	4.85212	0.482009	0.201553	0.0976517						30-40	10	0.0931895	1.68	0.2909	0.0307	0.0168	0.00695
		40-50	10	0.128549	1.61	0.2935	0.03195	0.01545	0.01125	9.18623	18.9968	26.0889	4.11791	0.44827	0.216769	0.157841						40-50	10	0.0985101	1.61	0.30295	0.03185	0.01395	0.00725	9.51177	21.7168	41.7862	4.39701	0.46227	0.20247	0.105226						40-50	10	0.106192	1.61	0.2895	0.03321	0.016465	0.0081385
		50-60	10	0.126507	1.7	0.2557	0.02955	0.0164	0.01235	8.65313	15.5915	20.7045	3.79699	0.438799	0.24353	0.18339	12.8773	1.4172	0.667901	0.459861		50-60	10	0.136082	1.7	0.2281	0.02745	0.0152	0.0083	8.30965	15.0066	27.4819	3.35002	0.403147	0.223236	0.121899	12.5991	1.34743	0.62726	0.324777		50-60	10	0.0980066	1.7	0.2295	0.0283	0.01725	0.00795
		60-70	10	0.13226	1.76	0.24145	0.02975	0.01615	0.0133	8.11597	14.9505	18.1541	3.68748	0.454349	0.246646	0.203121						60-70	10	0.16529	1.76	0.174	0.0247	0.01695	0.0085	7.04453	10.2655	20.4706	2.55622	0.362865	0.249011	0.124873						60-70	10	0.125151	1.76	0.2191	0.028105	0.017325	0.008448
		70-80	10	0.150066	1.76	0.25485	0.0324	0.01605	0.01205	7.86574	15.8785	21.1494	3.81226	0.484667	0.240089	0.180254						70-80	10	0.128296	1.76	0.1968	0.02245	0.0171	0.0094	8.76615	11.5088	20.9362	3.0193	0.344428	0.262348	0.144215						70-80	10	0.141579	1.76	0.15895	0.0253	0.0154	0.0089
		80-90	10	0.170625	1.77	0.21085	0.02705	0.0126	0.00895	7.79482	16.7341	23.5587	3.09526	0.397092	0.184967	0.131385	10.595	1.33611	0.671703	0.51476		80-90	10	0.127798	1.77	0.14635	0.022	0.01595	0.0085	6.65227	9.17555	17.2176	2.25935	0.339636	0.246236	0.131223	7.83487	1.04693	0.757594	0.40031		80-90	10	0.117398	1.77	0.1679	0.02274	0.01404	0.008424
		90-100	10	0.164284	1.77	0.18135	0.0255	0.0107	0.00755	7.11176	16.9486	24.0199	2.68256	0.377201	0.158276	0.111681						90-100	10	0.124862	1.77	0.1373	0.02135	0.01475	0.0086	6.43091	9.30847	15.9651	2.12677	0.33071	0.228477	0.133214						90-100	10	0.0923532	1.77	0.1529	0.02405	0.0131	0.0073
		100-110	10	0.211107	1.78	0.1515	0.02245	0.01005	0.0062	6.74833	15.0746	24.4355	2.12741	0.315249	0.141125	0.0870622						100-110	10	0.102523	1.78	0.14335	0.02415	0.01325	0.00915	5.93582	10.8189	15.6667	2.29003	0.385799	0.21167	0.146172						100-110	10	0.0997098	1.78	0.15845	0.024575	0.013155	0.0082425
		110-120	10	0.223153	1.8	0.1447	0.02105	0.01105	0.00725	6.87411	13.095	19.9586	2.02338	0.294347	0.154515	0.101379	6.83335	0.986797	0.453916	0.300122		110-120	10	0.0881802	1.8	0.14385	0.02585	0.01255	0.0099	5.5648	11.4622	14.5303	2.36097	0.42427	0.20598	0.162486	6.77777	1.14078	0.646127	0.441872		110-120	10	0.0984877	1.8	0.12775	0.02245	0.012355	0.007734
		120-130	10	0.237239	1.8	0.1013	0.0171	0.0096	0.0047	5.92398	10.5521	21.5532	1.39082	0.234778	0.131805	0.0645295						120-130	10	0.118107	1.8	0.17275	0.02815	0.0129	0.00985	6.13677	13.3915	17.5381	2.74225	0.446855	0.204776	0.15636						120-130	10	0.111984	1.8	0.1257	0.021575	0.011145	0.0068245
		130-140	10	0.27303	1.8	0.09505	0.01745	0.0102	0.00485	5.44699	9.31863	19.5979	1.24377	0.228341	0.133472	0.0634645						130-140	10	0.114458	1.8	0.16315	0.02745	0.01195	0.0094	5.94353	13.6527	17.3564	2.60057	0.437546	0.19048	0.149834						130-140	10	0.17762	1.8	0.1219	0.02105	0.010855	0.00657
		140-150	10	0.246377	1.86	0.0889	0.0163	0.01355	0.00356265	5.45399	6.56089	24.9533	1.24615	0.228483	0.189936	0.049939						140-150	10	0.163751	1.86	0.12185	0.0246	0.01105	0.00775	4.95325	11.0271	15.7226	1.89528	0.382634	0.171874	0.120545						140-150	10	0.213717	1.86	0.1183	0.021445	0.011075	0.0063225
		150-160	10	0.287922	1.86	0.05505	0.0127115	0.01815	0.003	4.33072	3.03306	18.35	0.729118	0.168359	0.24039	0.039734	4.60985	0.859962	0.695603	0.217667		150-160	10	0.169845	1.86	0.1054	0.02295	0.0107	0.0065	4.59259	9.85047	16.2154	1.62747	0.354368	0.165218	0.100366	8.86557	1.6214	0.732347	0.527104		150-160	10	0.256275	1.86	0.14555	0.02522	0.0114	0.0055815
				0.16465	1.7057	0.2566	0.0295288	0.0160875	0.00776329	7.8257	15.0587	32.2767	57.0499	6.61586	3.58877	1.79778								0.108487	1.71194	0.265594	0.0318312	0.0163656	0.00839688	7.67066	15.0375	31.7654	62.8399	7.59185	3.9058	2.05096								0.118511	1.71105	0.260197	0.0308513	0.0167884	0.00748659
[truncated: 56 more columns]
